# Supplementary material for: Examining the Interaction of the Gut Microbiome with Host Metabolism and Cardiometabolic Health in Metabolic Syndrome
Source: MDPI journal article supplement (doi:10.3390/nu13124318), 2021-11-29
Supplement: s1 [file s1]

## **Supplementary Material**

### **Supplemental Methods**

#### ***Fecal Metabolomics***

An initial amount of 10-15 mg of lyophilized feces was used for the sample preparation. Also, there was a previous step of metabolites extraction including a sonication and homogenization with either 500  $\mu$ L of PBS in case of NMR or 20  $\mu$ L of an internal standard in case of the other chromatographic platforms. After the extraction of the water components from the fecal matter, 200 $\mu$ L of fecal aqueous phase were diluted in 400 $\mu$ L of PBS in D<sub>2</sub>O (pH=7.4, 0.05M, TSP 1.48mM for diluted concentration of 1mM) and placed into a 5mm o.d. NMR tube. <sup>1</sup>H-NMR spectra were recorded at 300K on an Advance III 600 spectrometer (Bruker, Germany) operating at a proton frequency of 600.20MHz using a 5mm PBBO broadband gradient probe. The acquired NMR was compared to references of pure compounds from the metabolic profiling AMIX spectra database (Bruker®), HMDB, and ChemoX databases for metabolite identification. We assigned metabolites by <sup>1</sup>H–<sup>1</sup>H homonuclear correlation (COSY and TOCSY) and <sup>1</sup>H–<sup>13</sup>C heteronuclear (HSQC) 2D-NMR experiments and by correlation with pure compounds run in-house. After pre-processing, specific <sup>1</sup>H-NMR regions identified in the spectra were integrated using the AMIX 3.9 software package.

LC-qTOF was used to determine bile acids, amino acids and its derivatives. The chromatographic separation of bile acids was performed on a Kinetex EVO C18 (150x2.1mm) column and bile acid species were assigned by direct comparison with commercial standards. At the same time, the quantification of amino acids was achieved by chromatographic separation of performed on a ACQUITY UPLC HSS T3 Column, and the metabolites were identified by direct comparison with commercial standards. The chromatographic behavior and presence of possible interferences were based on a methodology previously described<sup>[1]</sup>.

The untargeted approach was focused on the detection of phenolic compounds, fatty acids and acylcarnitines. After a previous homogenization step with an internal standard reference for the class of the sought metabolites, the chromatographic separation was achieved with a gradient elution using milli-Q water (0.05% formic acid) and methanol (0.05% formic acid) on a reverse phase AQUITY BEH C18 (100x2.1mm) column from Waters®. The qTOF mass spectrometer operates in scan mode both in positive and negative electrospray ionization on two separate chromatographic runs. In addition, a target tandem mass spectrum (MS/MS) was acquired for QC sample at 20 eV for deconvoluted features. MassHunter qualitative analyses were used for metabolite profiling using “find by formula” algorithm from an in-house database created from the human fecal metabolome database from HMDB. The resulting tentative matched entities were refined manually by comparing the experimental MS/MS spectra, retention time with the information on database or pure standards when available, also published in relation to the main phenolic metabolites, fatty acids and other fecal metabolites. After metabolite screening, a total of 132 compounds were found and used in MassHunter quantitative analysis for chromatographic peak extraction and integration. The area of each metabolite was normalized by the area of the corresponding internal standard compound based on their structural similarity and retention time proximity. Finally, the matrix containing the semi-quantitative information for these metabolites was normalized by the exact sample weight.

### ***Plasma Metabolomics***

In case of TMAO determinations, aliquots of 50 µl were mixed with 10 µl of internal standard, 75 µl of 50mM tert-Butyl bromoacetate in ACN and 10 µl of 70% ammonium hydroxide. Samples were vortexed for 1 min and derivatized for 30 minutes at room temperature. A volume of 50 µl of 1% Formic acid in ACN was added. Samples were vortexed and centrifuged for 5 minutes at 15000 rpm and 4°C. Supernatants were

transferred to glass vials for their analysis. Mobile phase A was 10% acetonitrile/90% water and B was 90% acetonitrile/10% water, and both with 10 mM ammonium formate and 0.125% formic acid. The column temperature was set at room temperature and the injection volume was 1  $\mu$ L.

In case of acylcarnitines quantification, 30  $\mu$ L of plasma were mixed with 270  $\mu$ L of 100% methanol containing the set of labelled internal standards. The mixture was vortexed for 15 s and centrifuged during 10 min at 4700 rpm at 4°C. The supernatant was transferred into a new plate and injected on LC-MS/MS. The extraction was carried out with a semi-automated process using Agilent Bravo Automated Liquid Handling Platform. The chromatographic separation was performed with an isocratic gradient of mobile phase B was 100% methanol with 0.1% formic acid over 13 minutes. The column temperature was set at 20 °C and the injection volume was 1  $\mu$ L.

For the extraction of more hydrophobic lipids, a liquid-liquid extraction with chloroform:methanol (2:1) based on Folch procedure was performed by adding four volumes of chloroform:methanol (2:1) containing internal standard mixture (Lipidomic SPLASH) to serum. Then, the samples were mixed and incubated at -20°C for 30 minutes. Afterward, water with NaCl (0.8 %) was added and mixture was centrifuged at 15,000 rpm. The lower phase was recovered, evaporated to dryness and reconstituted with methanol:methyl-tert-butyl ether (9:1) and analyzed by UHPLC-qTOF (model 6550 of Agilent, USA) in positive electrospray ionization mode. The chromatographic method consists of elution with a ternary mobile phase containing water, methanol and 2-propanol with 10mM ammonium formate and 0.1% formic acid. The stationary phase was a C18 column (Kinetex EVO C18 Column, 2.6  $\mu$ m, 2.1 mm X 100 mm) that allows the sequential elution of the more hydrophobic lipids such as lysophospholipids,

sphingomyelins, phospholipids, diglycerides, triglycerides and cholesteryl esters, among others.

The identification of lipid species was performed by matching their accurate mass and tandem mass spectrum, when available, to Metlin-PCDL from Agilent containing more than 40,000 metabolites and lipids. In addition, chromatographic behavior of pure standards for each family and bibliographic information was used to ensure their putative identification.

Sample preparation was based on<sup>[1]</sup> to obtain volatile fatty acids methyl ester derivatives (FAMES). Briefly, 50 µl of plasma samples were mixed with IS solution, chloroform and methanolic HCl and incubated at 80 °C for 2 hours. Afterward, obtained FAMES were extracted by a liquid-liquid extraction using hexane before being injected into the GC-MS system.

Chromatographic analysis was based on<sup>[2]</sup> to determine the 37 FAMES included in Food Industry FAME Mix. Briefly, FAMES were separated on HP-88 (100 m x 250 µm x 0.25 µm) column using a temperature program between 140 and 240 °C at 1 mL/min using He as carrier gas. Ionization was carried out by electronic impact (70 eV) and the mass analyzer operates on Selected Ion Monitoring mode (SIM).

Serotonin was analyzed starting from 50 µL of plasma, which was aliquoted to a 1.5 ml Eppendorf tube and mixed with 5 µL of internal standard (Serotonin-d4 at 1 µg/mL) and 245 µL of acetonitrile. Samples were vortexed and centrifuged for 5 minutes at 15000 rpm and 4°C. Supernatants were transferred to glass vials for analysis. The analytical column used for serotonin was Luna Omega 1.6 µm Polar C18 (100 x 2.1 mm) (Phenomenex, Torrance, CA).

The chromatographic separation was performed with a linear gradient to 99% mobile phase B of 0.1% formic acid in acetonitrile. The column temperature was set at 35 °C and the injection volume was 5 µL.

Amino acids determination started from 8 µL of plasma mixed with 32 µL of internal standard (Metabolomics amino acid mix labeled standard from Cambridge Isotopes) in MeOH. Samples were vortexed and centrifuged for 5 minutes at 15000 rpm and 4°C. Supernatants (30 µL) were transferred to a new tube and evaporated in a SpeedVac at 45 °C. The analytical column used was ACQUITY UPLC HSS T3 Column, 1.7 µm, 2.1 mm x 150 mm (Waters, Milford, MA, USA). Samples were reconstituted with 30 µL of borate buffer and were derivatized using AccQ-Tag reagent from Waters following manufacturing protocol. The chromatographic separation was performed with a linear gradient to 70% mobile phase B (0.1% formic acid in acetonitrile) over 13 minutes and an isocratic gradient to 87% of mobile phase A (0.1% formic acid in water) over 2 minutes. The column temperature was set at 40 °C and the injection volume was 2 µL. The MRM transitions for amino acids and metabolites in all cases the precursor ion was the [derivatized amino acid + H]<sup>+</sup> and the main daughter ion was 171 m/z. The chromatographic behavior and presence of possible interferences was based on the methodology described by Wang et al<sup>[1]</sup>.

**Supplementary Table S1:** List of fecal metabolites analyzed

| <b>Name</b>           | <b>Platform</b> | <b>Approach</b> |
|-----------------------|-----------------|-----------------|
| 1,3-Dihydroxyacetone  | NMR             | Targeted        |
| 2-hydroxybutyrate     | NMR             | Targeted        |
| 2-Oxocaproate         | NMR             | Targeted        |
| Acetate               | NMR             | Targeted        |
| Arabinose             | NMR             | Targeted        |
| Butyrate              | NMR             | Targeted        |
| Caproate              | NMR             | Targeted        |
| Cholate               | NMR             | Targeted        |
| Choline               | NMR             | Targeted        |
| Dimethylamine         | NMR             | Targeted        |
| Ethanol               | NMR             | Targeted        |
| Ethanolamine          | NMR             | Targeted        |
| Formate               | NMR             | Targeted        |
| Fumarate              | NMR             | Targeted        |
| Galactonate           | NMR             | Targeted        |
| Glucose               | NMR             | Targeted        |
| Glycerol              | NMR             | Targeted        |
| Hydroxyacetone        | NMR             | Targeted        |
| Hypoxanthine          | NMR             | Targeted        |
| Isobutyrate           | NMR             | Targeted        |
| Malate                | NMR             | Targeted        |
| Malonate              | NMR             | Targeted        |
| Methanol              | NMR             | Targeted        |
| Methionine Sulphoxide | NMR             | Targeted        |
| Methylamine           | NMR             | Targeted        |
| Methylguanidine       | NMR             | Targeted        |
| Propionate            | NMR             | Targeted        |
| Ribose                | NMR             | Targeted        |
| Succinate             | NMR             | Targeted        |
| Trimethylamine        | NMR             | Targeted        |
| UDP-Glucuronate       | NMR             | Targeted        |
| Uracil                | NMR             | Targeted        |
| Uridine               | NMR             | Targeted        |
| Urocanate             | NMR             | Targeted        |
| Valerate              | NMR             | Targeted        |
| Xanthine              | NMR             | Targeted        |
| Xylose                | NMR             | Targeted        |
| 5-Aminolevulinic Acid | LC-qTOF         | Targeted        |
| ABA                   | LC-qTOF         | Targeted        |
| AIBA                  | LC-qTOF         | Targeted        |
| Alanine               | LC-qTOF         | Targeted        |
| Arginine              | LC-qTOF         | Targeted        |
| Asparagine            | LC-qTOF         | Targeted        |
| Aspartic acid         | LC-qTOF         | Targeted        |
| BAIBA                 | LC-qTOF         | Targeted        |
| bAlanine              | LC-qTOF         | Targeted        |
| CA                    | LC-qTOF         | Targeted        |
| Cadaverine            | LC-qTOF         | Targeted        |
| Carnosine             | LC-qTOF         | Targeted        |
| CDCA                  | LC-qTOF         | Targeted        |
| Citrulline            | LC-qTOF         | Targeted        |
| DCA                   | LC-qTOF         | Targeted        |
| Ethanolamine          | LC-qTOF         | Targeted        |
| GABA                  | LC-qTOF         | Targeted        |
| GCA                   | LC-qTOF         | Targeted        |

|                                                     |         |            |
|-----------------------------------------------------|---------|------------|
| GCDCA                                               | LC-qTOF | Targeted   |
| GDCA                                                | LC-qTOF | Targeted   |
| GLCA                                                | LC-qTOF | Targeted   |
| Glutamic acid                                       | LC-qTOF | Targeted   |
| Glutamine                                           | LC-qTOF | Targeted   |
| Glycine                                             | LC-qTOF | Targeted   |
| GUDCA                                               | LC-qTOF | Targeted   |
| HDCA                                                | LC-qTOF | Targeted   |
| Hipotaurine                                         | LC-qTOF | Targeted   |
| Histidine                                           | LC-qTOF | Targeted   |
| Homocitrulline                                      | LC-qTOF | Targeted   |
| Hydroxyproline trans                                | LC-qTOF | Targeted   |
| Isoleucine                                          | LC-qTOF | Targeted   |
| Kynurenine                                          | LC-qTOF | Targeted   |
| L-2-Aminoadipic Acid                                | LC-qTOF | Targeted   |
| LCA                                                 | LC-qTOF | Targeted   |
| Leucine                                             | LC-qTOF | Targeted   |
| Lysine                                              | LC-qTOF | Targeted   |
| Methionine                                          | LC-qTOF | Targeted   |
| Ornithine                                           | LC-qTOF | Targeted   |
| Phenylalanine                                       | LC-qTOF | Targeted   |
| Pipecolic Acid                                      | LC-qTOF | Targeted   |
| Proline                                             | LC-qTOF | Targeted   |
| Putrescine                                          | LC-qTOF | Targeted   |
| Sarcosine                                           | LC-qTOF | Targeted   |
| Serine                                              | LC-qTOF | Targeted   |
| Serotonin                                           | LC-qTOF | Targeted   |
| Spermidine                                          | LC-qTOF | Targeted   |
| Taurine                                             | LC-qTOF | Targeted   |
| TCA                                                 | LC-qTOF | Targeted   |
| TCDCA                                               | LC-qTOF | Targeted   |
| TDCA                                                | LC-qTOF | Targeted   |
| Threonine                                           | LC-qTOF | Targeted   |
| TLCA                                                | LC-qTOF | Targeted   |
| Tryptophan                                          | LC-qTOF | Targeted   |
| TUDCA                                               | LC-qTOF | Targeted   |
| Tyrosine                                            | LC-qTOF | Targeted   |
| UDCA                                                | LC-qTOF | Targeted   |
| Valine                                              | LC-qTOF | Targeted   |
| (S)-14-Methylhexadecanoic acid                      | LC-qTOF | Untargeted |
| 10Z-Heptadecenoic acid                              | LC-qTOF | Untargeted |
| 10Z-Nonadecenoic acid                               | LC-qTOF | Untargeted |
| 11Z-Eicosenoic acid                                 | LC-qTOF | Untargeted |
| 12,13-DHOME                                         | LC-qTOF | Untargeted |
| 13-HODE                                             | LC-qTOF | Untargeted |
| 13-Methylmyristic acid                              | LC-qTOF | Untargeted |
| 1-Stearoylglycerophosphoinositol                    | LC-qTOF | Untargeted |
| 2-Hydroxyhexadecanoic acid                          | LC-qTOF | Untargeted |
| 2-Hydroxymyristic acid                              | LC-qTOF | Untargeted |
| 2-Hydroxyphenylacetic acid                          | LC-qTOF | Untargeted |
| 2-Hydroxystearic acid                               | LC-qTOF | Untargeted |
| 2-Methylglutaric acid                               | LC-qTOF | Untargeted |
| 2-Oleoyleglycerophosphocholine                      | LC-qTOF | Untargeted |
| 3-(3'-Hydroxyphenyl)propionic acid                  | LC-qTOF | Untargeted |
| 3-(3'-Hydroxyphenyl)propionic acid-4'-O-glucuronide | LC-qTOF | Untargeted |

|                                                            |         |            |
|------------------------------------------------------------|---------|------------|
| 3-(3'-Methoxy-4'-hydroxyphenyl)propionic acid              | LC-qTOF | Untargeted |
| 3-(4'-Hydroxyphenyl)propionic acid-3'-O-glucuronide        | LC-qTOF | Untargeted |
| 3-(Phenyl)propionic acid-3'-sulfate                        | LC-qTOF | Untargeted |
| 3,4-Dihydroxyphenylacetic acid                             | LC-qTOF | Untargeted |
| 3'-Methoxy-4'-hydroxyphenylacetic acid                     | LC-qTOF | Untargeted |
| 3-Hydroxy-3-(3-hydroxyphenyl)propionic acid                | LC-qTOF | Untargeted |
| 3-Hydroxybenzoic acid (3-OH-BA)                            | LC-qTOF | Untargeted |
| 3-Phenylpropionic acid                                     | LC-qTOF | Untargeted |
| 4-Hydroxybenzoic acid (4-OH-BA)                            | LC-qTOF | Untargeted |
| 5-(3',4'-Dihydroxyphenyl)- $\gamma$ -valerolactone         | LC-qTOF | Untargeted |
| 5-(3'-Hydroxyphenyl)- $\gamma$ -valerolactone              | LC-qTOF | Untargeted |
| 5,8,11-Eicosatrienoic acid                                 | LC-qTOF | Untargeted |
| 5-Hydroxyhexanoic acid                                     | LC-qTOF | Untargeted |
| 7Z,10Z-Hexadecadienoic acid                                | LC-qTOF | Untargeted |
| 8,11,14-Eicosatrienoic acid                                | LC-qTOF | Untargeted |
| 9,10-DHOME                                                 | LC-qTOF | Untargeted |
| 9-HODE                                                     | LC-qTOF | Untargeted |
| 9Z-Eicosenoic acid                                         | LC-qTOF | Untargeted |
| Acetaminophen                                              | LC-qTOF | Untargeted |
| Adrenic acid                                               | LC-qTOF | Untargeted |
| Alpha-Linolenic acid                                       | LC-qTOF | Untargeted |
| Arachidic acid                                             | LC-qTOF | Untargeted |
| Arachidonic acid                                           | LC-qTOF | Untargeted |
| Arginyl-Isoleucine                                         | LC-qTOF | Untargeted |
| Arginyl-Phenylalanine                                      | LC-qTOF | Untargeted |
| Azelaic acid                                               | LC-qTOF | Untargeted |
| Behenic acid                                               | LC-qTOF | Untargeted |
| Benzoic acid (BA)                                          | LC-qTOF | Untargeted |
| Bilirubin                                                  | LC-qTOF | Untargeted |
| Caffeic acid 3-O- $\beta$ -d-glucuronide (CA-3-Glu)        | LC-qTOF | Untargeted |
| Caffeic acid 4-O- $\beta$ -d-glucuronide (CA-4-Glu)        | LC-qTOF | Untargeted |
| Caffeine                                                   | LC-qTOF | Untargeted |
| Capric acid                                                | LC-qTOF | Untargeted |
| Chlorogenic acid                                           | LC-qTOF | Untargeted |
| Chlorogenic acid-iso                                       | LC-qTOF | Untargeted |
| Decanoyl-carnitine/Fumaryl-carnitine                       | LC-qTOF | Untargeted |
| Dehydroepiandrosterone sulfate                             | LC-qTOF | Untargeted |
| Dihomolinoleic acid                                        | LC-qTOF | Untargeted |
| Dihydrocaffeic acid 3-O- $\beta$ -d-glucuronide (DHCA-Glu) | LC-qTOF | Untargeted |
| Docosahexaenoic acid                                       | LC-qTOF | Untargeted |
| Docosapentaenoic acid (22n-3)                              | LC-qTOF | Untargeted |
| Docosapentaenoic acid (22n-6)                              | LC-qTOF | Untargeted |
| Docosatrienoic acid                                        | LC-qTOF | Untargeted |
| Dodecanoic acid                                            | LC-qTOF | Untargeted |
| Dodecanoyl-carnitine                                       | LC-qTOF | Untargeted |



|                                                            |         |            |
|------------------------------------------------------------|---------|------------|
| D-Urobilinogen+Urobilin                                    | LC-qTOF | Untargeted |
| Eicosadienoic acid                                         | LC-qTOF | Untargeted |
| Eicosapentaenoic acid                                      | LC-qTOF | Untargeted |
| Elaidic acid                                               | LC-qTOF | Untargeted |
| Enterodiol                                                 | LC-qTOF | Untargeted |
| Enterolactone                                              | LC-qTOF | Untargeted |
| Ferulic acid/Isoferulic acid<br>(IsoFA)                    | LC-qTOF | Untargeted |
| Free carnitine                                             | LC-qTOF | Untargeted |
| gamma-Glutamyltryptophan                                   | LC-qTOF | Untargeted |
| Gamma-Linolenic acid                                       | LC-qTOF | Untargeted |
| Gluconic acid                                              | LC-qTOF | Untargeted |
| Glutaminylglutamine                                        | LC-qTOF | Untargeted |
| Heptadecanoic acid                                         | LC-qTOF | Untargeted |
| Hexadecanoyl-carnitine                                     | LC-qTOF | Untargeted |
| Hexadecenyl-carnitine                                      | LC-qTOF | Untargeted |
| Hippuric acid (HA)                                         | LC-qTOF | Untargeted |
| HistidinyI-Isoleucine                                      | LC-qTOF | Untargeted |
| HistidinyI-Phenylalanine                                   | LC-qTOF | Untargeted |
| HistidinyI-Proline                                         | LC-qTOF | Untargeted |
| Linoelaidic acid                                           | LC-qTOF | Untargeted |
| Linoleic acid                                              | LC-qTOF | Untargeted |
| LysoPC(20:4(8Z,11Z,14Z,17Z))                               | LC-qTOF | Untargeted |
| LysoPE(0:0/18:1(11Z))                                      | LC-qTOF | Untargeted |
| LysoPE(15:0/0:0)                                           | LC-qTOF | Untargeted |
| LysoPE(16:0/0:0)                                           | LC-qTOF | Untargeted |
| LysoPE(18:0/0:0)                                           | LC-qTOF | Untargeted |
| LysoPE(18:2(9Z,12Z)/0:0)                                   | LC-qTOF | Untargeted |
| Mesobilirubinogen                                          | LC-qTOF | Untargeted |
| Methyl 3-phenylpropanoate                                  | LC-qTOF | Untargeted |
| Methyladipic acid                                          | LC-qTOF | Untargeted |
| Mevalonic acid                                             | LC-qTOF | Untargeted |
| Myristic acid                                              | LC-qTOF | Untargeted |
| N-AcetylIleucine                                           | LC-qTOF | Untargeted |
| N-Acetyl-L-methionine                                      | LC-qTOF | Untargeted |
| N-Acetyl-L-phenylalanine                                   | LC-qTOF | Untargeted |
| N-acetyltryptophan                                         | LC-qTOF | Untargeted |
| Nervonic acid                                              | LC-qTOF | Untargeted |
| Nonadecanoic acid                                          | LC-qTOF | Untargeted |
| Octadecadienyl-carnitine                                   | LC-qTOF | Untargeted |
| Octadecenyl-carnitine                                      | LC-qTOF | Untargeted |
| Octadecenyl-carnitine                                      | LC-qTOF | Untargeted |
| Octenoyl-carnitine                                         | LC-qTOF | Untargeted |
| Oleanolic acid                                             | LC-qTOF | Untargeted |
| Oleic acid                                                 | LC-qTOF | Untargeted |
| Palmitelaidic acid                                         | LC-qTOF | Untargeted |
| Palmitic acid                                              | LC-qTOF | Untargeted |
| Palmitoleic acid                                           | LC-qTOF | Untargeted |
| Pantothenic acid                                           | LC-qTOF | Untargeted |
| p-Cresol                                                   | LC-qTOF | Untargeted |
| p-Cresol sulfate                                           | LC-qTOF | Untargeted |
| Pentadecanoic acid                                         | LC-qTOF | Untargeted |
| Pentadecanoyl-<br>carnitine/isopentadecanoyl-<br>carnitine | LC-qTOF | Untargeted |
| Phenylacetic acid (PA)                                     | LC-qTOF | Untargeted |
| Phytanic acid                                              | LC-qTOF | Untargeted |
| Stearic acid                                               | LC-qTOF | Untargeted |

|                                                                                |         |            |
|--------------------------------------------------------------------------------|---------|------------|
| Stercobilin                                                                    | LC-qTOF | Untargeted |
| Suberic acid                                                                   | LC-qTOF | Untargeted |
| Tetracosanoic acid                                                             | LC-qTOF | Untargeted |
| Tetradecanoyl-carnitine                                                        | LC-qTOF | Untargeted |
| Threoninyl-Phenylalanine                                                       | LC-qTOF | Untargeted |
| Tricosanoic acid                                                               | LC-qTOF | Untargeted |
| Tryptophyl-Tryptophan                                                          | LC-qTOF | Untargeted |
| Tyrosol                                                                        | LC-qTOF | Untargeted |
| Tyrosol                                                                        | LC-qTOF | Untargeted |
| Undecanoyl-<br>carnitine/Glutaconyl-<br>carnitine/iso-undecanoyl-<br>carnitine | LC-qTOF | Untargeted |
| Urolithin A                                                                    | LC-qTOF | Untargeted |
| Urolithin B                                                                    | LC-qTOF | Untargeted |
| Urolithin C                                                                    | LC-qTOF | Untargeted |
| Ursolic acid                                                                   | LC-qTOF | Untargeted |
| Valyl-Histidine                                                                | LC-qTOF | Untargeted |
| Valyl-Tryptophan                                                               | LC-qTOF | Untargeted |

**Supplementary Table S2:** List of plasma metabolites analyzed

| Name                     | Platform |
|--------------------------|----------|
| 11.13-Eicosadienoicacid  | LC-qTOF  |
| 12.13-DiHOME(9)          | LC-qTOF  |
| 12-HETE                  | LC-qTOF  |
| 15-HETE                  | LC-qTOF  |
| 1methylhistidine         | LC-QqQ   |
| 20-HETE                  | LC-qTOF  |
| 2-hydroxyglutaricacid    | LC-qTOF  |
| 3-Hydroxybutyricacid     | LC-qTOF  |
| 3Methylhistidine         | LC-QqQ   |
| 3-Phosphoglycericacid    | LC-qTOF  |
| 5-Aminolevulinic acid    | LC-QqQ   |
| 5-HETE                   | LC-qTOF  |
| 9.10-DiHOME(12)          | LC-qTOF  |
| 9.10-EpOME(12)           | LC-qTOF  |
| 9.12.13-TriHOME(10)      | LC-qTOF  |
| 9-HODE/13-HODE           | LC-qTOF  |
| 9-OxoODE                 | LC-qTOF  |
| ABA                      | LC-QqQ   |
| Adrenicacid              | LC-qTOF  |
| a-ketoglutaricacid       | LC-qTOF  |
| Alanine                  | LC-QqQ   |
| androsteronesulfate-iso1 | LC-qTOF  |
| androsteronesulfate-iso2 | LC-qTOF  |
| androsteronesulfate-iso3 | LC-qTOF  |
| androsteronesulfate-iso4 | LC-qTOF  |
| androsteronesulfate-iso5 | LC-qTOF  |
| Arabitol                 | LC-qTOF  |
| Arachidonicacid          | LC-qTOF  |
| Arginine                 | LC-QqQ   |
| Asparagine               | LC-QqQ   |
| Asparticacid             | LC-QqQ   |
| a-tocopherol             | LC-qTOF  |
| BAIBA                    | LC-QqQ   |
| bAlanine                 | LC-QqQ   |
| Behenic acid (C22:0)     | LC-qTOF  |
| Betaine                  | LC-QqQ   |
| C0                       | LC-QqQ   |
| C10:0                    | LC-QqQ   |
| C10:1                    | LC-QqQ   |

|                       |         |
|-----------------------|---------|
| C12:0                 | LC-QqQ  |
| C12:0-OH-a            | LC-QqQ  |
| C12:0-OH-b            | LC-QqQ  |
| C12:1                 | LC-QqQ  |
| C14:0                 | LC-QqQ  |
| C14:0-OH              | LC-QqQ  |
| C14:1                 | LC-QqQ  |
| C14:2                 | LC-QqQ  |
| C16:0                 | LC-QqQ  |
| C16:0-OH              | LC-QqQ  |
| C16:1                 | LC-QqQ  |
| C18:0                 | LC-QqQ  |
| C18:1                 | LC-QqQ  |
| C18:2                 | LC-QqQ  |
| C2:0                  | LC-QqQ  |
| C3:0                  | LC-QqQ  |
| C4:0                  | LC-QqQ  |
| C4:0-2M               | LC-QqQ  |
| C40-iso               | LC-QqQ  |
| C5:0                  | LC-QqQ  |
| C5:1                  | LC-QqQ  |
| C5-DC                 | LC-QqQ  |
| C5-M-DC               | LC-QqQ  |
| C5-OH                 | LC-QqQ  |
| C6:0                  | LC-QqQ  |
| C8:0                  | LC-QqQ  |
| C8:1                  | LC-QqQ  |
| Chenodeoxycholic acid | LC-qTOF |
| ChoE(16:0)            | LC-qTOF |
| ChoE(16:1)            | LC-qTOF |
| ChoE(17:0)            | LC-qTOF |
| ChoE(18:0)            | LC-qTOF |
| ChoE(18:1)            | LC-qTOF |
| ChoE(18:2)            | LC-qTOF |
| ChoE(18:3)            | LC-qTOF |
| ChoE(20:2)            | LC-qTOF |
| ChoE(20:3)            | LC-qTOF |
| ChoE(20:4)            | LC-qTOF |
| ChoE(20:5)            | LC-qTOF |
| ChoE(22:4)            | LC-qTOF |
| ChoE(22:5)            | LC-qTOF |
| ChoE(22:6)            | LC-qTOF |
| Cholicacid            | LC-qTOF |

|                                  |         |
|----------------------------------|---------|
| Choline                          | LC-QqQ  |
| cis-10 heptadecenoicacid         | LC-qTOF |
| cis-palmitoleicacid(palmitoleic) | LC-qTOF |
| Citricacid                       | LC-qTOF |
| Citrulline                       | LC-QqQ  |
| Cortisol                         | LC-qTOF |
| Cortisone                        | LC-qTOF |
| Cystathione                      | LC-QqQ  |
| Cystine                          | LC-QqQ  |
| Deoxycholicacid                  | LC-qTOF |
| Deoxycholicacid-iso1             | LC-qTOF |
| Deoxycholicacid-iso2             | LC-qTOF |
| DG34:1                           | LC-qTOF |
| DG34:2                           | LC-qTOF |
| DG34:3                           | LC-qTOF |
| DG36:0                           | LC-qTOF |
| DG36:1                           | LC-qTOF |
| DG36:2                           | LC-qTOF |
| DG36:3                           | LC-qTOF |
| DG36:4                           | LC-qTOF |
| DHA                              | LC-qTOF |
| DHEAS                            | LC-qTOF |
| DiHODE                           | LC-qTOF |
| dihomo-γ-linolenic acid-iso1     | LC-qTOF |
| dihomo-γ-linolenic acid-iso2     | LC-qTOF |
| dihomo-γ-linolenic acid-iso3     | LC-qTOF |
| dihomo-γ-linolenicacid           | LC-qTOF |
| Dodecanoic acid (C12:0)          | LC-qTOF |
| Eicosenoicacid                   | LC-qTOF |
| EPA                              | LC-qTOF |
| EpOME-iso2                       | LC-qTOF |
| EpOME-iso3                       | LC-qTOF |
| epoxy-stearicacid-iso1           | LC-qTOF |
| epoxy-stearicacid-iso2           | LC-qTOF |
| Ethanolamine                     | LC-QqQ  |
| Fumaricacid                      | LC-qTOF |
| GABA                             | LC-QqQ  |
| Glutamicacid                     | LC-QqQ  |
| Glutamine                        | LC-QqQ  |
| Glycericacid                     | LC-qTOF |
| Glycerol-1-phosphate             | LC-qTOF |
| Glycine                          | LC-QqQ  |
| Glycochenodeoxycholicacid        | LC-qTOF |

|                            |         |
|----------------------------|---------|
| Glycocholic acid           | LC-qTOF |
| Glycocholic acid-iso1      | LC-qTOF |
| Glycodeoxycholicacid       | LC-qTOF |
| Glycolicacid               | LC-qTOF |
| Glycoursodeoxycholicacid   | LC-qTOF |
| Heptadecanoic acid (C17:0) | LC-qTOF |
| Histidine                  | LC-QqQ  |
| HODE-iso1                  | LC-qTOF |
| HpEPE                      | LC-qTOF |
| HpODE                      | LC-qTOF |
| Hydroxylysine              | LC-QqQ  |
| Hydroxyprolinetrans        | LC-QqQ  |
| Isoleucine                 | LC-QqQ  |
| Kynurenine                 | LC-QqQ  |
| Lacticacid                 | LC-qTOF |
| Leucine                    | LC-QqQ  |
| Lignocericacid(C24:0)      | LC-qTOF |
| Linoleicacid               | LC-qTOF |
| Linolenicacid-iso1         | LC-qTOF |
| Linolenicacid-iso2         | LC-qTOF |
| Lithocholicacid            | LC-qTOF |
| LPC14:0                    | GC-qTOF |
| LPC14:0-sn2                | LC-qTOF |
| LPC15:0                    | LC-qTOF |
| LPC15:0-sn2                | LC-qTOF |
| LPC16:0                    | LC-qTOF |
| LPC16:0e                   | LC-qTOF |
| LPC16:0-sn2                | LC-qTOF |
| LPC16:1                    | LC-qTOF |
| LPC16:1e                   | LC-qTOF |
| LPC16:1-sn2                | LC-qTOF |
| LPC17:0                    | LC-qTOF |
| LPC17:0-sn2                | LC-qTOF |
| LPC17:1-sn1                | LC-qTOF |
| LPC17:1-sn2                | LC-qTOF |
| LPC18:0                    | LC-qTOF |
| LPC18:0e                   | LC-qTOF |
| LPC18:0-sn2                | LC-qTOF |
| LPC18:1                    | LC-qTOF |
| LPC18:1-sn2                | LC-qTOF |
| LPC18:2                    | LC-qTOF |
| LPC18:2-sn2                | LC-qTOF |
| LPC18:3-sn1                | LC-qTOF |

|             |         |
|-------------|---------|
| LPC18:3-sn2 | LC-qTOF |
| LPC19:0-sn1 | LC-qTOF |
| LPC19:0-sn2 | LC-qTOF |
| LPC19:1-sn1 | LC-qTOF |
| LPC20:0     | LC-qTOF |
| LPC20:0-sn2 | LC-qTOF |
| LPC20:1     | LC-qTOF |
| LPC20:1-sn2 | LC-qTOF |
| LPC20:2     | LC-qTOF |
| LPC20:2-sn2 | LC-qTOF |
| LPC20:3     | LC-qTOF |
| LPC20:3-sn2 | LC-qTOF |
| LPC20:4     | LC-qTOF |
| LPC20:4-sn2 | LC-qTOF |
| LPC20:5-sn1 | LC-qTOF |
| LPC20:5-sn2 | LC-qTOF |
| LPC22:3-sn1 | LC-qTOF |
| LPC22:3-sn2 | LC-qTOF |
| LPC22:4-sn1 | LC-qTOF |
| LPC22:4-sn2 | LC-qTOF |
| LPC22:5-sn1 | LC-qTOF |
| LPC22:6     | LC-qTOF |
| LPC22:6-sn2 | LC-qTOF |
| LPE14:0-sn1 | LC-qTOF |
| LPE14:0-sn2 | LC-qTOF |
| LPE15:0-sn1 | LC-qTOF |
| LPE15:0-sn2 | LC-qTOF |
| LPE16:0-sn1 | LC-qTOF |
| LPE16:0-sn2 | LC-qTOF |
| LPE16:1-sn1 | LC-qTOF |
| LPE16:1-sn2 | LC-qTOF |
| LPE17:0-sn1 | LC-qTOF |
| LPE17:1-sn1 | LC-qTOF |
| LPE17:1-sn2 | LC-qTOF |
| LPE18:0-sn1 | LC-qTOF |
| LPE18:0-sn2 | LC-qTOF |
| LPE18:1-sn1 | LC-qTOF |
| LPE18:1-sn2 | LC-qTOF |
| LPE18:2-sn1 | LC-qTOF |
| LPE18:2-sn2 | LC-qTOF |
| LPE18:3-sn1 | LC-qTOF |
| LPE18:3-sn2 | LC-qTOF |
| LPE20:1-sn1 | LC-qTOF |

|                                |         |
|--------------------------------|---------|
| LPE20:1-sn2                    | LC-qTOF |
| LPE20:2-sn1                    | LC-qTOF |
| LPE20:3-sn1                    | LC-qTOF |
| LPE20:3-sn2                    | LC-qTOF |
| LPE20:4-sn1                    | LC-qTOF |
| LPE20:4-sn2                    | LC-qTOF |
| LPE20:5-sn1                    | LC-qTOF |
| LPE20:5-sn2                    | LC-qTOF |
| LPE22:4-sn1                    | LC-qTOF |
| LPE22:4-sn2                    | LC-qTOF |
| LPE22:5-sn1                    | LC-qTOF |
| LPE22:5-sn2                    | LC-qTOF |
| LPE22:6-sn1                    | LC-qTOF |
| LPE22:6-sn2                    | LC-qTOF |
| LPI14:0                        | LC-qTOF |
| LPI16:0                        | LC-qTOF |
| LPI16:1                        | LC-qTOF |
| LPI17:0                        | LC-qTOF |
| LPI18:0                        | LC-qTOF |
| LPI18:1                        | LC-qTOF |
| LPI18:2                        | LC-qTOF |
| LPI20:3                        | LC-qTOF |
| LPI20:4                        | LC-qTOF |
| LPI20:5                        | LC-qTOF |
| LPI22:4                        | LC-qTOF |
| LPI22:6                        | LC-qTOF |
| Lysine                         | LC-QqQ  |
| Malicacid                      | LC-qTOF |
| Methionine                     | LC-QqQ  |
| Myristicacid                   | GC-qTOF |
| Nervonic acid (C24:1 [cis-15]) | LC-qTOF |
| N-Linoleylethanolamine         | GC-qTOF |
| N-oleylethanolamine            | GC-qTOF |
| Nonadecenoicacid               | GC-qTOF |
| N-palmitoyl ethanolamine       | GC-qTOF |
| N-stearoyl-ethanolamine        | GC-qTOF |
| Oleicacid                      | GC-qTOF |
| Ornithine                      | LC-QqQ  |
| OxoODE-iso1                    | GC-qTOF |
| OxoODE-iso2                    | GC-qTOF |
| Palmiticacid                   | GC-qTOF |
| PC30:0                         | LC-qTOF |
| PC31:0                         | LC-qTOF |



|                     |         |
|---------------------|---------|
| PC32:0              | LC-qTOF |
| PC32:1              | LC-qTOF |
| PC32:1e             | LC-qTOF |
| PC32:2              | LC-qTOF |
| PC33:1              | LC-qTOF |
| PC33:2              | LC-qTOF |
| PC34:0              | LC-qTOF |
| PC34:1              | LC-qTOF |
| PC34:1e             | LC-qTOF |
| PC34:2              | LC-qTOF |
| PC34:2e             | LC-qTOF |
| PC34:3              | LC-qTOF |
| PC34:4              | LC-qTOF |
| PC35:1              | LC-qTOF |
| PC36:1              | LC-qTOF |
| PC36:2              | LC-qTOF |
| PC36:2e             | LC-qTOF |
| PC36:3              | LC-qTOF |
| PC36:4              | LC-qTOF |
| PC36:4e             | LC-qTOF |
| PC36:5              | LC-qTOF |
| PC36:5e             | LC-qTOF |
| PC38:2              | LC-qTOF |
| PC38:3              | LC-qTOF |
| PC38:4              | LC-qTOF |
| PC38:4e             | LC-qTOF |
| PC38:5              | LC-qTOF |
| PC38:5e             | LC-qTOF |
| PC38:6              | LC-qTOF |
| PC40:4              | LC-qTOF |
| PC40:4e             | LC-qTOF |
| PC40:5              | LC-qTOF |
| PC40:5e             | LC-qTOF |
| PC40:6              | LC-qTOF |
| PC42:5e             | LC-qTOF |
| PE36:5e             | LC-qTOF |
| PE38:5e             | LC-qTOF |
| Pentadecanoicacid   | GC-qTOF |
| Phenylalanine       | LC-QqQ  |
| Phosphoethanolamine | LC-QqQ  |
| Pregnenolonesulfate | GC-qTOF |
| Proline             | LC-QqQ  |
| Pyruvicacid         | LC-qTOF |

|                           |         |
|---------------------------|---------|
| Sarcosine                 | LC-QqQ  |
| SDA                       | GC-qTOF |
| SDA-iso1                  | GC-qTOF |
| Serine                    | LC-QqQ  |
| Serotonina                | LC-QqQ  |
| SM32:0                    | LC-qTOF |
| SM32:1                    | LC-qTOF |
| SM32:2                    | LC-qTOF |
| SM33:1                    | LC-qTOF |
| SM34:1                    | LC-qTOF |
| SM34:2                    | LC-qTOF |
| SM36:0                    | LC-qTOF |
| SM36:1                    | LC-qTOF |
| SM36:2                    | LC-qTOF |
| SM38:1                    | LC-qTOF |
| SM38:2                    | LC-qTOF |
| SM39:1                    | LC-qTOF |
| SM40:1                    | LC-qTOF |
| SM40:2                    | LC-qTOF |
| SM41:1                    | LC-qTOF |
| SM41:2                    | LC-qTOF |
| SM42:1                    | LC-qTOF |
| SM42:2                    | LC-qTOF |
| SM42:3                    | LC-qTOF |
| SM43:1                    | LC-qTOF |
| SM43:2                    | LC-qTOF |
| Sphinganine-1-P           | GC-qTOF |
| Sphingosine-1-P           | GC-qTOF |
| Stearicacid               | GC-qTOF |
| Succinicacid              | LC-qTOF |
| Taurine                   | LC-QqQ  |
| Taurochenodeoxycholicacid | GC-qTOF |
| Taurocholicacid           | GC-qTOF |
| Taurodeoxycholicacid      | GC-qTOF |
| Taurolithocholicacid      | GC-qTOF |
| Testosterone              | GC-qTOF |
| TG46:0                    | LC-qTOF |
| TG46:1                    | LC-qTOF |
| TG46:2                    | LC-qTOF |
| TG47:0                    | LC-qTOF |
| TG47:1                    | LC-qTOF |
| TG48:0                    | LC-qTOF |
| TG48:1                    | LC-qTOF |

|                                    |         |
|------------------------------------|---------|
| TG48:2                             | LC-qTOF |
| TG48:3                             | LC-qTOF |
| TG50:0                             | LC-qTOF |
| TG50:1                             | LC-qTOF |
| TG50:2                             | LC-qTOF |
| TG50:3                             | LC-qTOF |
| TG50:4                             | LC-qTOF |
| TG51:2                             | LC-qTOF |
| TG52:1                             | LC-qTOF |
| TG52:2                             | LC-qTOF |
| TG52:3                             | LC-qTOF |
| TG52:4                             | LC-qTOF |
| TG52:5                             | LC-qTOF |
| TG54:2                             | LC-qTOF |
| TG54:3                             | LC-qTOF |
| TG54:4                             | LC-qTOF |
| TG54:5                             | LC-qTOF |
| TG54:6                             | LC-qTOF |
| TG54:7                             | LC-qTOF |
| TG56:5                             | LC-qTOF |
| TG56:6                             | LC-qTOF |
| TG56:7                             | LC-qTOF |
| TG58:8                             | LC-qTOF |
| Threonicacid                       | LC-qTOF |
| Threonine                          | LC-QqQ  |
| TMA                                | LC-QqQ  |
| TMAO                               | LC-QqQ  |
| Tryptophan                         | LC-QqQ  |
| Tyrosine                           | LC-QqQ  |
| Ursodeoxycholic/Hyodeoxicholicacid | GC-qTOF |
| Valine                             | LC-QqQ  |
| w3-DPA                             | GC-qTOF |
| w6-DPA                             | GC-qTOF |

**Supplementary Table S3:** Summary statistics of the network analysis

|                            |       |
|----------------------------|-------|
| Number of nodes            | 94    |
| Number of edges            | 263   |
| Av.g number of neighbors   | 6733  |
| Network diameter           | 4     |
| Network radius             | 2     |
| Characteristic path lenght | 2,041 |
| Network density            | 0,232 |
| Network heterogeneity      | 0,709 |
| Network centralization     | 0,416 |
| Connected components       | 5     |

**Figure S1:** Description of the connected components of the network

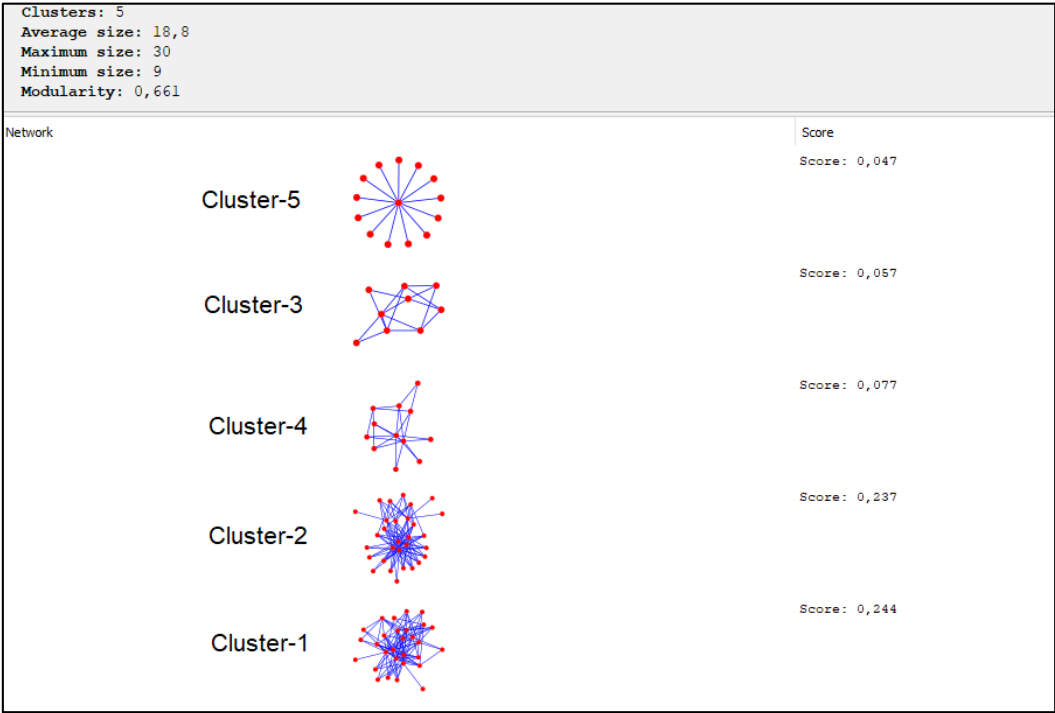

**Figure S2:** Heatmap of correlations from the network similarity matrix between selected plasma and fecal metabolites\*

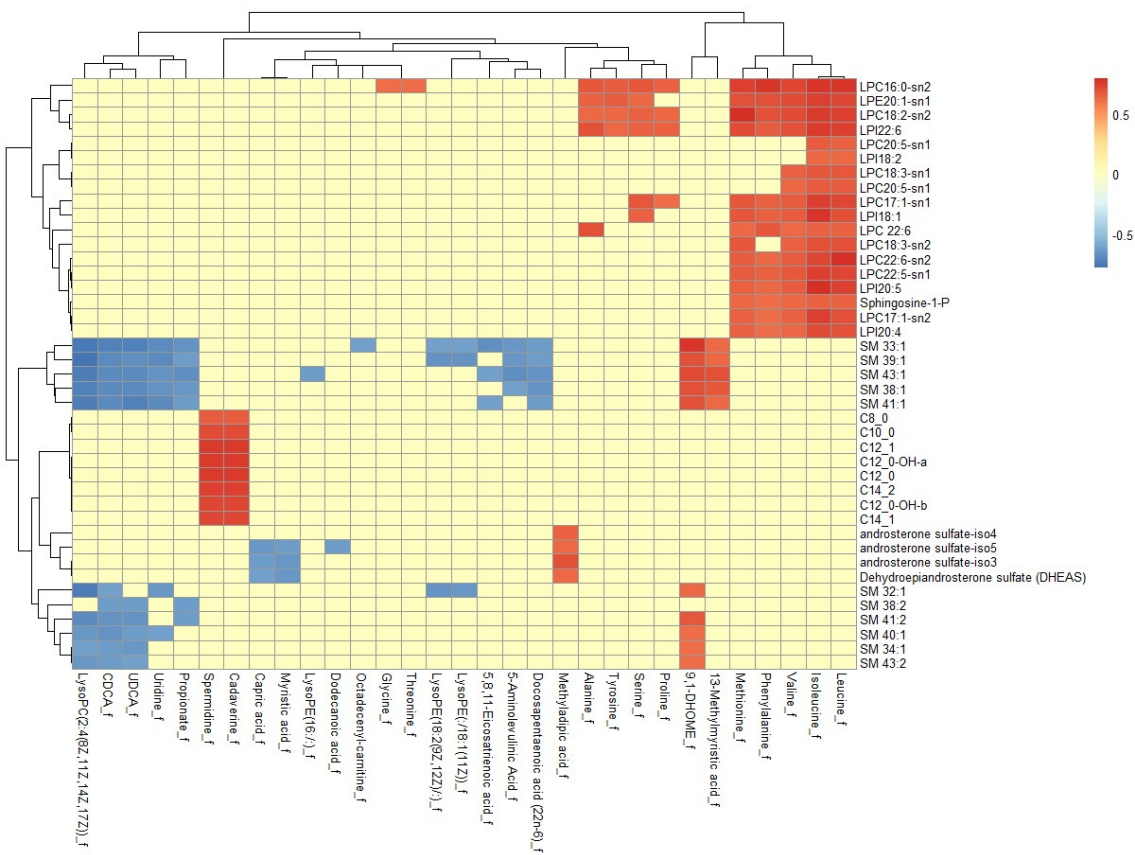

\*\_f stands for fecal metabolites

**Figure S3:** Heatmap of correlations from the network similarity matrix between selected plasma metabolites and microbial genera

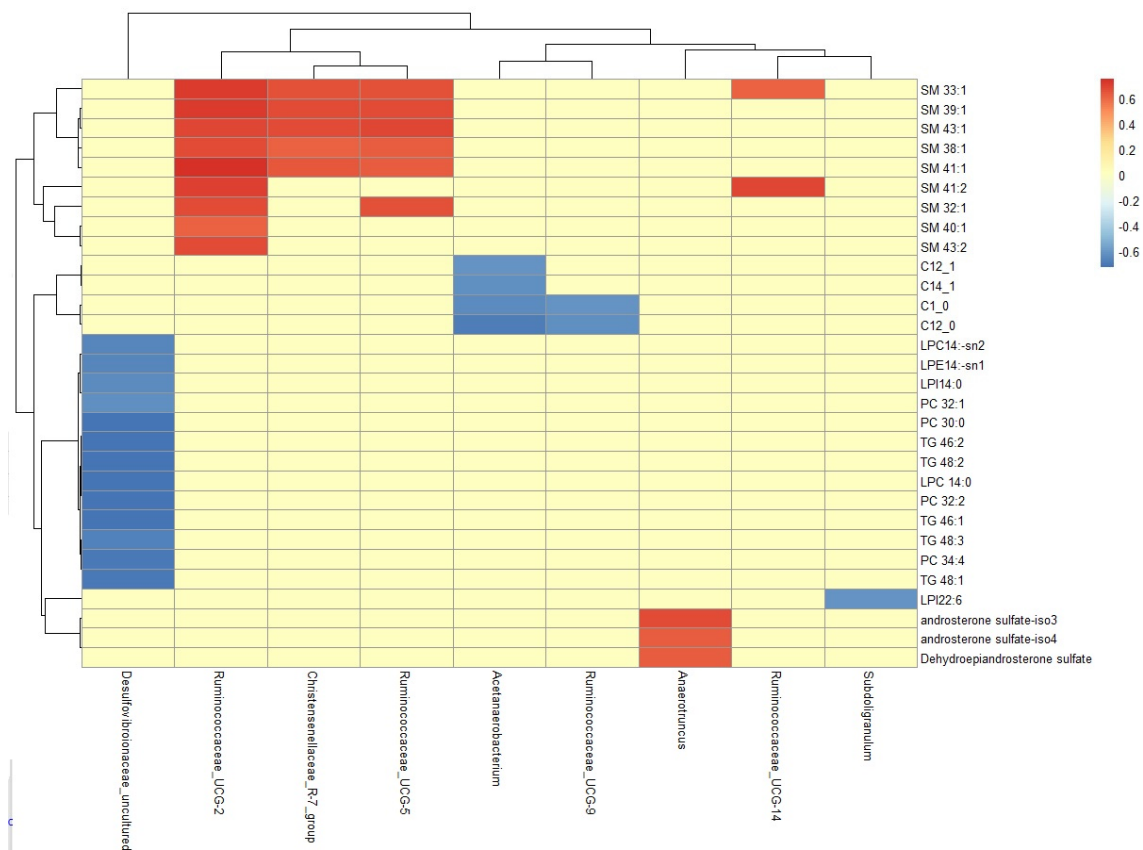

**Figure S4:** Heatmap of correlations from the network similarity matrix between selected fecal metabolites and microbial genera\*

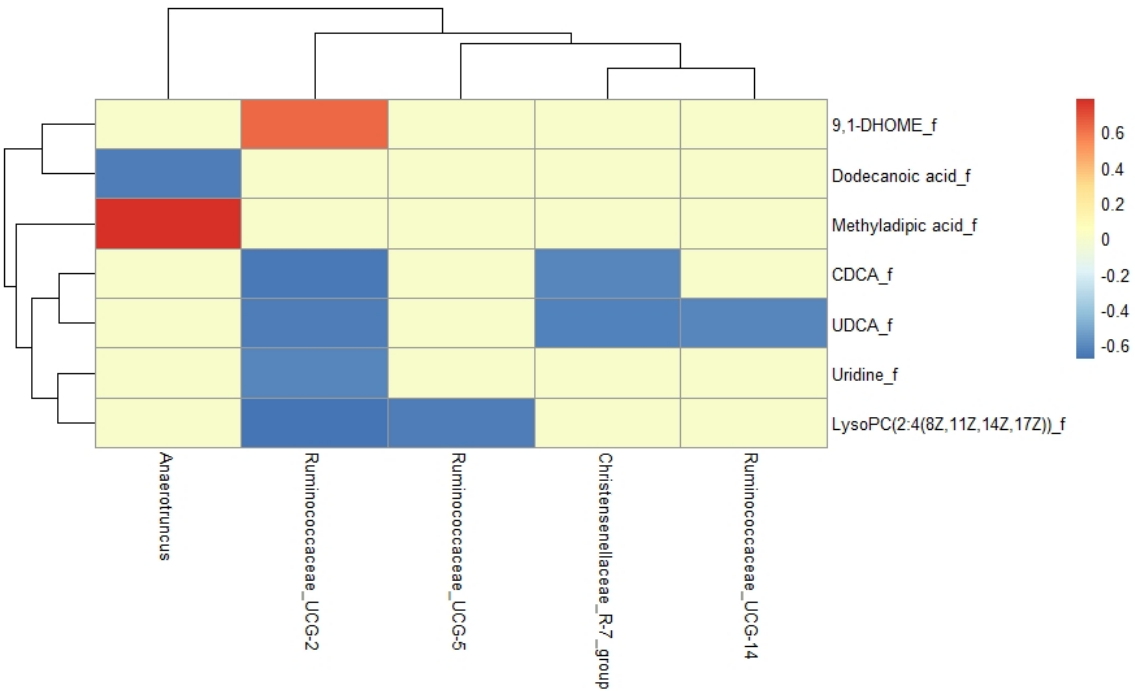

\*\_f stands for fecal metabolites

## References

- [1] J. Wang, L. Zhou, H. Lei, et al. Simultaneous Quantification of Amino Metabolites in Multiple Metabolic Pathways Using Ultra-High Performance Liquid Chromatography with Tandem-mass Spectrometry. *Sci Rep.* Published online 2017 DOI:10.1038/s41598-017-01435-7.
  
- [2] T.B.K.M.S.T.P. David F. Automated Sample Preparation for Profiling Fatty Acids in Blood and Plasma using the Agilent 7693 ALS. *Agilent.* Published online 2009.
